# Supplementary material
Source: PubMed Central journal article supplement (PMC5879708)
Supplement: pnas.1721916115.sapp.pdf [file pnas.1721916115.sapp.pdf]

**Supplementary information Appendix for “Occurrence, Evolution and  
Functions of DNA Phosphorothioate Epigenetics in Bacteria”**

**Table S1. Analysis of consensus sequences in *P. fluorescens* pf0-1**

|                 |            | Downstream        |                  |                   |                  |
|-----------------|------------|-------------------|------------------|-------------------|------------------|
|                 | 5'-GGCC-3' | A                 | C                | G                 | T                |
| <b>Upstream</b> | <b>A</b>   | 4.4% (242/5,519)  | 2.2% (92/4,180)  | 4.8% (437/9,026)  | 2.7% (123/4,534) |
|                 | <b>C</b>   | 4.9% (659/13,344) | 3.9% (248/6,391) | 5.4% (554/10,234) | 6.2% (557/9,026) |
|                 | <b>G</b>   | 3.8% (184/4,888)  | 1.5% (24/1,628)  | 5.1% (326/6,391)  | 4.5% (190/4,180) |
|                 | <b>T</b>   | 5.0% (478/9,488)  | 3.6% (174/4,888) | 4.8% (643/13,344) | 4.9% (271/5,519) |

**Table S2. Distribution of PT in different genome regions in *P. fluorescens* pf0-1**

| Regions       | Total PT | Region number | Region total length (nt) | PT density (PT per 10 <sup>3</sup> nt) # | Genomic PT density (PT per 10 <sup>3</sup> nt) | <i>p</i> value (region vs genome) |
|---------------|----------|---------------|--------------------------|------------------------------------------|------------------------------------------------|-----------------------------------|
| ORF           | 2549     | 5722          | 5780682                  | 0.44 ± 0.73                              |                                                | 0.23                              |
| ORF promotor  | 318      | 5722          | 1143839                  | 0.278 ± 1.161                            |                                                | 1.59 × 10 <sup>-6</sup> ***       |
| rRNA          | 8        | 18            | 24427                    | 0.238 ± 0.314                            |                                                | 5.84 × 10 <sup>-11</sup> ***      |
| tRNA          | 2        | 73            | 5690                     | 0.37 ± 3.163                             | 0.404                                          | 0.24                              |
| rRNA promotor | 0        | 18            | 3600                     | 0                                        |                                                | NA                                |
| tRNA promotor | 0        | 73            | 12273                    | 0                                        |                                                | NA                                |
| Noncoding     | 2544     | 2045          | 6430618                  | 0.336 ± 0.574                            |                                                | 0.014*                            |

#: mean ± SD, \*: *p* < 0.05; \*\*\*: *p* < 0.001; NA: not applicable

**Table S3. Differentially transcribed genes in TT-5**

| Gene ID    | Function                             | Promoter<br>PT sites | Internal<br>PT sites | COG       | Fold change<br>(log <sub>2</sub> ) <sup>a</sup> |
|------------|--------------------------------------|----------------------|----------------------|-----------|-------------------------------------------------|
| Pfl01_0738 | DNA PT modification protein DndB     | 0                    | 1                    | not found | -4.82                                           |
| Pfl01_0739 | DNA PT modification protein DndC     | 0                    | 0                    | E         | -17.39                                          |
| Pfl01_0740 | DNA PT modification protein DndD     | 0                    | 1                    | L         | -17.73                                          |
| Pfl01_0741 | DNA PT modification protein DndE     | 0                    | 0                    | not found | -15.93                                          |
| Pfl01_0900 | Putative membrane protein            | 0                    | 0                    | M         | 1.04                                            |
| Pfl01_1169 | Putative phage tail assembly protein | 0                    | 0                    | not found | 1.06                                            |
| Pfl01_1797 | Putative xanthine dehydrogenase      | 0                    | 0                    | F         | 1.64                                            |
| Pfl01_2488 | Hypothetical protein                 | 0                    | 1                    | not found | 1.02                                            |
| Pfl01_3496 | Phage protein                        | 0                    | 0                    | not found | 1.04                                            |
| Pfl01_5657 | N-acetylmuramoyl-L-alanine amidase   | 0                    | 0                    | M         | 1.85                                            |

<sup>a</sup>Difference in the expression of TT-5 compared with that of wild-type *P. fluorescens* pf0-1; the “Internal PT sites” column indicates the number of PT-modified G<sub>PS</sub>GCC motifs occurring in each gene’s internal region. The COG categories are identified by capital letters as follows: E, amino acid transport and metabolism; L, replication; M, cell wall/membrane/envelope biogenesis; and F, nucleotide transport and metabolism.

**Table S4. DNA templates for *in vitro* transcription**

| Gene ID    | Sequence                                                                                                                                                                                                                                                                                                                                                                                                                       |
|------------|--------------------------------------------------------------------------------------------------------------------------------------------------------------------------------------------------------------------------------------------------------------------------------------------------------------------------------------------------------------------------------------------------------------------------------|
| Pfi01_1326 | gtcaattgcccagcatgagtgacgagtgacgagatagaaccagtcagag*gccgctcATGGAATTCTTCGAAAA<br>GTTAACCAGTCTTGCCGCCAAAGTTTCGGTTGCAGAGCGCTGCAATCCAGACAGAA<br>GAGGCGACAAAAACGCGTTTGTTCATGCCCTTCATCAGTACTGTTCTGGGTTACG<br>ACGTATTCGACCCGACAGAGGTGACGCCGGAATTTGTTGCGATATCGGCACGAA<br>GAAGGGCGAAAAATCGATTACGCCATCATGAAAGAGGGCGAAGTGCAGATCCTC<br>ATCGAGTGCAAGAAAATCGGCGAGCCACTGCACATCAATCACGCCTCGCAG                                                   |
| Pfi01_1884 | ttcgactttgccgcccagcggcggttctctacaatccgcccagtttagccgaccccatccttagcggctg*gcctggatcc<br>tttttcATGGACGATATTCAACAGCGCTGGCTGTGCGCCCTCTCTGCGCCAATGGCC<br>GCGCTTAATACCGGTGCCGGTATGACGACCCTGCCTTCTGCGACGACCGCTAT<br>ATCGATCTGAAAGGCAGCTGGGGAATCGATGACCGGCGACAATTGTTTCGACATG<br>CTTCAATGGATGACGAGCAGCGACATGCAAAGCACCTGAGTGGCGCCTATTTCG<br>GCGTGGCAACGTTGTCTGCGAATGAATGGCAGCGCCTGCTCGAAGAGCTGAGC<br>CTCCTCGAGCGTGTTCATGATGATTTGCCAGTCGCAC |
| Pfi01_5242 | tggtgattgaacgttcaatcaaaacaaaatagactggccctcaatccgatcggcggttgcgtccgctggaag*gcctaag<br>gagatctgcaagATGCCCAAGGTCGGTATGCAACCCATCCGCCGCCAACAACTGATCG<br>AAGCCACTTTGCAGGCGGTTGATCAGGTCGGAATGGGGGACGCCAGCATTGCGC<br>TGATCGCCCGTTTGGCCGGTGTCTCGAATGGCATCATCAGTCACTATTTTCAGGA<br>CAAGAACGGCCTGATTGCCGCCACGATGCGGTATCTGATGAGCGTCTCAGCGA<br>GAACGTCACCGCGCGCCGTGAGGCGCTGGCAGACAGCAGCCCCCGGGCGCATC<br>TGCAGGTGATCATCGAAGGCAAC               |
| Pfi01_0914 | ccgccaccgattacaggggttgggcataaccgatggcagcgcg*gccgggactggaatggcaagacgggg<br>ctaaaacgaggcatgcccggagatttagATGAGTCCGCGCCAACGTTTCTTCGATTGTCTGC<br>ACCGTTCACCGCCCGCGCTGTTTCGAAGCGCGTGTGGATGGCCGCCGAGCAC<br>GACAAACAAGCCGATCCCGAAGCGCTGTTGCAGGAATCAAGGAACTGCAGCAG<br>CGGGTCAGCTATGGCTTGCCGTTGCTGCCGGTCAGCGAGCTGGCGCAACCGCT<br>GCTGCGGCGCATGACCGATCTGGGGTTGCCAGGATGATTTTCGTACCGTTGC                                                     |
| Pfi01_3453 | tcagggcggggcttcggttgcg*gccggcccgttcggcgattgaccggcgcgattcagctccaataaaaccaaggg<br>aatgagtATGCAAGCCGAATTGATCGTCGACGCCCGCAACGCGGTGGGTGAAAGCC<br>CGGTGTGGGTGCCGCAGGAAAATGCGCTCTACTGGGTCGATATCCCCAACGGTG<br>GCCTGCAACGCTGGGATGCCGACACTGGCCATGTTACGCCTGGAAGGCTCCCC<br>AGATGCTCGCCTGCCTCGCCCGACACAGCCGGGGCGGCTGGGTGGCCGGTATG<br>GAGAGCGGGTCTTTCAACTGCGCCCCACAGCGATGGCAGCCTTGA                                                          |
| Pfi01_5077 | ccagttagctgatcgatacagaaggtgttgatcacctgtctg*gccgtgaagaatcgaggagctgctgggATG<br>AACCAGGAACGCGTATTTAAAGTTCTGCTTGGCCCGCACGTTTCCGAGAAGGCTA<br>CGTTTCTGGCAGACAAGAAAGGCCAGTTCGTTTTCAAGTTGCTACTGACGCAAC<br>CAAGCTGGAAATCAAGAAGGCCGTCGAAAGCCTGTTTCAGCGTGAAGTTGAGCG<br>TGTTACTACCCTGAACGTTCTGGGTAAGAGTAAGCGCACCGCTCGCGGTCTGGG<br>CAAGCGTAATGACTGGAAGAAGGCAGTTATCTCCCTTCAGCCAG                                                             |
| Pfi01_1383 | gacgattcgcggatcatgggctgggctgaagacgttgacggtgcaatgacgcagcgttgcgatggacgccggcccc<br>gcggtctttctactagcccgaatctggggatcggggggcaatggATGAACCGCAATGAACTACGCAA<br>GATCCG*GCCGACATCAACCTGATGGTGGTGTTCGAGACCTTGATGCTCGAACC<br>CAACGT                                                                                                                                                                                                        |
| Pfi01_5297 | gggtcagcgaatgctgaagcaagcagatcagcagatattcggcgactgattgagcaatcgtctcggcgcaaaaatc<br>gcaagcctccagccgctgctgaattgctgagggcgcaGTGGTGAACACGCCTCTGGATCCG*G<br>CCCACGACCTGCTGTGGGGCATGACGCCGGCGCAGTTGCCGGCGGATGCGCC                                                                                                                                                                                                                        |
| Pfi01_0510 | acatcacctccaagccttcggcaaaaccgcgagtgatcgagaaagccctgcacagtttagccagcgggcca<br>tgacagctacaatccctcccttgtgctctggagacctcacATGTCTGATTTCTCTGGCCTGGATCCG*<br>GCCCTGGTGTGATCGAGCCGAGCGATCTGCTGCCGCGCCTCGAATCCCAGGATCT                                                                                                                                                                                                                     |
| Pfi01_4820 | cctgccgattcctacaaccgtaaccgactatctgacactttgtcacctgcaccccgcgtgttggcgctgactgtgact<br>aggctataagtcagactgtctgacatccgggattcccATGAATGACATCGCTCTGAGCGGTCTGGA<br>TCCG*GCCAAGCAATTGGTACAGGCCGAAGTCTCACGGAAAAAAGCGCCAGC<br>ACGC                                                                                                                                                                                                           |

\* Denotes chemically synthesized PT modification; the sequences in red are commercially synthesized; the sequences in blue are amplified by PCR; and the sequences in capitalized letters are predicted ORFs.

**Table S5. Differential metabolites between *P. fluorescens* pf0-1 and TT-5**

|                | Name                                                                          | VIP  | m/z      | TT-5/WT fold change |
|----------------|-------------------------------------------------------------------------------|------|----------|---------------------|
| <b>ESI (+)</b> |                                                                               |      |          |                     |
| H              | Proline                                                                       | 1.52 | 116.0016 | 5.26                |
| H              | Phenylalanine                                                                 | 1.76 | 166.085  | 2.27                |
| Na             | C16 sphinganine                                                               | 1.49 | 296.2567 | 2.04                |
| Na             | 1-(9Z-nonadecenoyl)-glycero-3-phosphate (PA(19:1(9Z)/0:0))                    | 1.86 | 473.2597 | 1.75                |
| H              | Oleic Acid                                                                    | 1.77 | 283.2658 | 1.64                |
| H              | 1-Tridecanoyl-sn-glycero-3-phosphocholine (PC(13:0/0:0))                      | 1.84 | 454.2918 | 1.61                |
| H              | Glyceric acid                                                                 | 1.38 | 107.0307 | 1.61                |
| H              | D-Glucose 6-phosphate                                                         | 1.37 | 261.0386 | 1.61                |
| Na             | Phytosphingosine                                                              | 1.81 | 340.2921 | 1.54                |
| H              | 1-Undecanoyl-sn-glycero-3-phosphocholine (PC(11:0/0:0))                       | 1.83 | 427.2657 | 1.52                |
| H              | Cysteine                                                                      | 1.8  | 144.0074 | 1.52                |
| Na             | 1-Dodecanoyl-glycero-3-phosphoserine (PS(12:0/0:0))                           | 1.87 | 464.2088 | 1.45                |
| H              | 1-(1Z-hexadecenyl)-sn-glycero-3-phosphoethanolamine (PE(P-16:0/0:0))          | 1.77 | 438.2956 | 1.41                |
| Na             | Jasmonic acid                                                                 | 1.51 | 233.1121 | 1.28                |
| H              | 1-(9Z-octadecenoyl)-sn-glycero-3-phospho-(1'-myo-inositol) (PI(18:1(9Z)/0:0)) | 1.53 | 599.3368 | 1.27                |
| H              | 1-(11Z-eicosenoyl)-glycero-3-phospho-(1'-sn-glycerol) (PG(20:1(11Z)/0:0))     | 1.26 | 539.3497 | 1.25                |
| H              | 1-Dodecanoyl-2-tridecanoyl-sn-glycero-3-phosphate (PA(12:0/13:0))             | 1.32 | 551.3574 | 1.25                |
| Na             | 1-Hexadecanoyl-sn-glycero-3-phospho-(1'-sn-glycerol) (PG(16:0/0:0))           | 1.32 | 507.2732 | 1.23                |
| H              | 5-HETE                                                                        | 1.35 | 321.0889 | 1.22                |
| H              | Kynurenine                                                                    | 1.32 | 209.0684 | 1.19                |
| H              | Sphinganine                                                                   | 1.6  | 302.3046 | 1.16                |
| Na             | 1-(9Z-tetradecenoyl)-glycero-3-phosphoserine (PS(14:1(9Z)/0:0))               | 1.65 | 490.222  | 0.88                |
| Na             | Indole                                                                        | 1.79 | 140.0508 | 0.88                |
| H              | Cyclic GMP                                                                    | 1.64 | 346.1362 | 0.84                |
| Na             | 1-Tetradecanoyl-glycero-3-phosphoserine (PS(14:0/0:0))                        | 1.7  | 492.2434 | 0.83                |
| H              | 1-Nonanoyl-sn-glycero-3-phosphocholine (PC(9:0/0:0))                          | 1.35 | 398.2399 | 0.83                |
| Na             | N-(2-hydroxy-eicosanoyl)-tetradecasphing-4-enine (Cer(d14:1(4E)/20:0(2OH)))   | 1.92 | 576.508  | 0.83                |
| Na             | 1-Propionyl-sn-glycero-3-phosphocholine (PC(3:0/0:0))                         | 1.31 | 336.1207 | 0.82                |
| H              | Cytosine                                                                      | 1.37 | 112.0442 | 0.74                |
| Na             | MG(0:0/18:2(9Z,12Z)/0:0)                                                      | 1.3  | 377.2615 | 0.72                |
| H              | C17 sphingosine-1-phosphate                                                   | 1.83 | 366.2335 | 0.67                |
| H              | Taurine                                                                       | 1.74 | 125.9449 | 0.62                |
| Na             | Glycine                                                                       | 1.43 | 98.0219  | 0.50                |

|    |                                                               |      |          |      |
|----|---------------------------------------------------------------|------|----------|------|
| H  | Citric acid                                                   | 1.56 | 215.0132 | 0.45 |
| Na | 1,2-Dihexanoyl-sn-glycero-3-phosphoethanolamine (PE(6:0/6:0)) | 1.4  | 434.1877 | 0.33 |
| Na | 1-Octadecanoyl-sn-glycero-3-phosphate (PA(18:0/0:0))          | 1.44 | 461.2582 | 0.20 |
| Na | Quinic acid                                                   | 1.89 | 215.0559 | 0.14 |
| Na | N-(heptadecanoyl)-sphinganine (Cer(d18:0/17:0))               | 1.38 | 576.5245 | 0.06 |

#### ESI (-)

|   |                                         |      |          |      |
|---|-----------------------------------------|------|----------|------|
| H | Leukotriene A4                          | 2.17 | 492.2273 | 5.88 |
| H | Docosanoic acid                         | 1.92 | 659.4733 | 5.26 |
| H | 3-Dehydrogulonate                       | 1.67 | 278.4681 | 2.22 |
| H | 2-Aminoadipate semialdehyde             | 1.67 | 186.2861 | 2.22 |
| H | Phosphoribosylamine                     | 1.55 | 297.4832 | 2.08 |
| H | Uridine triphosphate (UTP)              | 1.92 | 855.5725 | 1.18 |
| H | 17beta-Estradiol 3-(beta-D-glucuronide) | 2.06 | 773.4253 | 1.16 |
| H | 3a-Hydroxy-5b-pregnane-20-one           | 1.55 | 492.2789 | 1.09 |
| H | L-methionine                            | 1.49 | 189.4449 | 0.50 |
| H | Progesterone                            | 1.57 | 478.9468 | 0.47 |

**Table S6. Quantification of genes related to proline metabolism in *P. fluorescens* pf0-1 and TT-5 by real-time RT-PCR**

|                                                                                                      | <b>Genes</b>                    | <b>pf0-1</b>  | <b>TT-5</b>  |
|------------------------------------------------------------------------------------------------------|---------------------------------|---------------|--------------|
| <b>Average Ct ± SD</b>                                                                               | <i>Ornithine cyclodeaminase</i> | 23.33 ± 1.27  | 22.89 ± 1.20 |
|                                                                                                      | <i>proA</i>                     | 23.68 ± 1.61  | 23.99 ± 2.05 |
|                                                                                                      | <i>proB</i>                     | 19.52 ± 1.52  | 19.27 ± 1.30 |
|                                                                                                      | <i>proC</i>                     | 18.76 ± 1.60  | 18.33 ± 1.13 |
|                                                                                                      | <i>putA</i>                     | 17.68 ± 1.64  | 17.47 ± 0.93 |
|                                                                                                      | <i>rpoD</i>                     | 16.44 ± 1.60  | 16.61 ± 1.26 |
| <b>ΔCt ± SD</b>                                                                                      | <i>Ornithine cyclodeaminase</i> | 6.89 ± 0.33   | 6.28 ± 0.064 |
|                                                                                                      | <i>proA</i>                     | 7.24 ± 0.0007 | 7.38 ± 0.78  |
|                                                                                                      | <i>proB</i>                     | 3.08 ± 0.088  | 2.66 ± 0.036 |
|                                                                                                      | <i>proC</i>                     | 2.32 ± 0.0002 | 1.72 ± 0.14  |
|                                                                                                      | <i>putA</i>                     | 1.25 ± 0.038  | 0.86 ± 0.34  |
| <b>Fold change relative to <i>ropD</i><br/><math>2^{-\Delta\Delta Ct}</math><br/>(TT-5 vs pf0-1)</b> | <i>Ornithine cyclodeaminase</i> | 1.54 ± 0.29   |              |
|                                                                                                      | <i>proA</i>                     | 1.07 ± 0.65   |              |
|                                                                                                      | <i>proB</i>                     | 1.34 ± 0.11   |              |
|                                                                                                      | <i>proC</i>                     | 1.52 ± 0.15   |              |
|                                                                                                      | <i>putA</i>                     | 1.33 ± 0.34   |              |

**Table S7. Bacterial strains and plasmids used in this study**

| Strains or plasmids          | Genotype or description                                                                                                                                                                                                     | Sources or reference |
|------------------------------|-----------------------------------------------------------------------------------------------------------------------------------------------------------------------------------------------------------------------------|----------------------|
| <b><i>E. coli</i></b>        |                                                                                                                                                                                                                             |                      |
| WM3064                       | <i>thrB1004 pro thi rpsL hsdS</i>                                                                                                                                                                                           | (1)                  |
| Trans1-T1                    | <i>lacZΔM15RP4–1360Δ(araBAD)567ΔdapA1341::[erm pir(wt)]</i><br>F <sup>-</sup> ϕ80( <i>lacZ</i> )ΔM15Δ <i>lacX74</i> hsdR( <i>r<sub>k</sub><sup>-</sup></i> , <i>m<sub>k</sub><sup>+</sup></i> )Δ <i>recA1398end A1 tonA</i> | TransGene Biotech    |
| <b><i>P. fluorescens</i></b> |                                                                                                                                                                                                                             |                      |
| pf0-1                        | Wild type, Amp <sup>r</sup>                                                                                                                                                                                                 | (2)                  |
| TT-5                         | pf0-1 derivative, <i>dndBCDE</i> deletion mutant                                                                                                                                                                            | This work            |
| <b>Plasmid</b>               |                                                                                                                                                                                                                             |                      |
| pEASY™ Blunt Zero            | Cloning vector, Amp <sup>r</sup> , Kan <sup>r</sup>                                                                                                                                                                         | TransGene Biotech    |
| pSR47s                       | <i>sacB</i> -containing suicide vector (containing the R6K replication origin), kan <sup>r</sup>                                                                                                                            | (3)                  |
| pWHU3345                     | pEASY-blunt zero derivative with a 1,725-bp NotI fragment carrying an in-frame deletion of <i>dndBCDE</i>                                                                                                                   | This work            |
| pWHU3350                     | Suicide plasmid pSR47s derivative with a 1,725-bp NotI fragment carrying an in-frame deletion of <i>dndBCDE</i>                                                                                                             | This work            |
| pWHU3636                     | pDSK519 derivative with a 5.3-kb NotI-BamHI fragment carrying <i>dndBCDE</i> of pf0-1                                                                                                                                       | This work            |



**Table S8. PCR and DNA sequencing primers used in this study**

| <b>Primer</b>                                                        | <b>5'-3'</b>                                                   |
|----------------------------------------------------------------------|----------------------------------------------------------------|
| <b>Construction of TT-5 with in-frame deletion of <i>dndBCDE</i></b> |                                                                |
| spf01                                                                | GCGGCCGCTTAGGATGTGGCAGGTGACT                                   |
| spf02                                                                | TGAAAGCCCTCTGTGGACATGAGGCATAAGCTCTTCGTTGT                      |
| spf03                                                                | ACAACGAAGAGCTTATGCCTCATGTCCACAGAGGGCTTTCA                      |
| spf04                                                                | GCGGCCGCGCCTTAATCTTCGCTTCAGCAT                                 |
| spfup                                                                | GATGTCTTCGCTTCCG                                               |
| spfdown                                                              | GAAGTAGAGCCCCGAAACA                                            |
| <b><i>In vitro</i> transcription</b>                                 |                                                                |
| Pfl01_1326-qPCR-F                                                    | ATCCAGACAGAAGAGGCGAC                                           |
| Pfl01_1884-qPCR-F                                                    | CAATGGCCGCGCTTAATACC                                           |
| Pfl01_5242-qPCR-F                                                    | TGATCGAAGCCACTTTGCAG                                           |
| Pfl01_0914-qPCR-F                                                    | GATTGTCTGCACCGTTCACC                                           |
| Pfl01_3453-qPCR-F                                                    | GGAAAATGCGCTCTACTGGG                                           |
| Pfl01_5077-qPCR-F                                                    | AGAAAGGCCAGTTCGTTTTCA                                          |
| Pfl01_1383-qPCR-F                                                    | TGGATGAACCGCAATGA ACTAC                                        |
| Pfl01_5297-qPCR-F                                                    | GCAGTGGTGAACACGCCTCT                                           |
| Pfl01_0510-qPCR-F                                                    | ATGTCTGATTTCTCTGGCCTGG                                         |
| Pfl01_4820-qPCR-F                                                    | CCATGAATGACATCGCTCTG                                           |
| qPCR-R (Tag)                                                         | AATTGGTGACACTCAGGCAC                                           |
| Pfl01_1326-reverse transcription                                     | AATTGGTGACACTCAGGCACCAAACAAATTCCGGCGTCAC                       |
| Pfl01_1884-reverse transcription                                     | AATTGGTGACACTCAGGCACGCATGTCTGAACAATTGTTCGC                     |
| Pfl01_5242-reverse transcription                                     | AATTGGTGACACTCAGGCACCAATCAGGCCGTTCTTGTCC                       |
| Pfl01_0914-reverse transcription                                     | AATTGGTGACACTCAGGCACACTGCTGCAGTTCCTTGAATTCC                    |
| Pfl01_3453-reverse transcription                                     | AATTGGTGACACTCAGGCACGAGCATCTCGGGAGCCTTC                        |
| Pfl01_5077-reverse transcription                                     | AATTGGTGACACTCAGGCACGGGTAGTAACACGCTCAACT                       |
| Pfl01_1383-reverse transcription                                     | AATTGGTGACACTCAGGCACACTCTCGAACACCACCATCAGG                     |
| Pfl01_5297-reverse transcription                                     | AATTGGTGACACTCAGGCACA ACTGCGCCGGCGTCATG                        |
| Pfl01_0510-reverse transcription                                     | AATTGGTGACACTCAGGCACAGCAGATCGCTCGGCTCGAT                       |
| Pfl01_4820-reverse transcription                                     | AATTGGTGACACTCAGGCACGTGAGCAGTTCGGCCTGTA                        |
| <b>Construction of the pWHU3636 plasmid</b>                          |                                                                |
| spf-B-up                                                             | CTAGTATGACGTCTGTTCGCACCTGCTTGATCGCGGCCGCAAT<br>GGCACGGTAGGTAGC |
| Spf-E-down                                                           | CCCAAGCTTGCATGCCTGCAGGTCGACTCTAGAGGATCCCCT<br>CACAAAAGGTGGCGA  |
| <b>Proline metabolism</b>                                            |                                                                |
| proB-F                                                               | CTTCTGACTCACGACGACCT                                           |
| proB-R                                                               | CGGATTTTCGTGACGTGACCAC                                         |
| proA-F                                                               | TGCAACACCTTGAACGTCTG                                           |
| proA-R                                                               | GCCTTCGACGATGTGCAATT                                           |
| putA-F                                                               | ACAAAGGTCGCAACGTGTAC                                           |
| putA-R                                                               | AAGATCTCGCGTTGCAGTTC                                           |
| proC-F                                                               | GTCTGGAAGCTGCACACATC                                           |
| proC-R                                                               | CTTGACCGCCAGTACCACTA                                           |
| Ornithine cyclodeaminase-F                                           | AAAGCCTCAACGACATGCAG                                           |
| Ornithine cyclodeaminase-R                                           | CTTTTCCGCTGAGCAGATCC                                           |

$p=0.003$

DndBCD

DndFGH

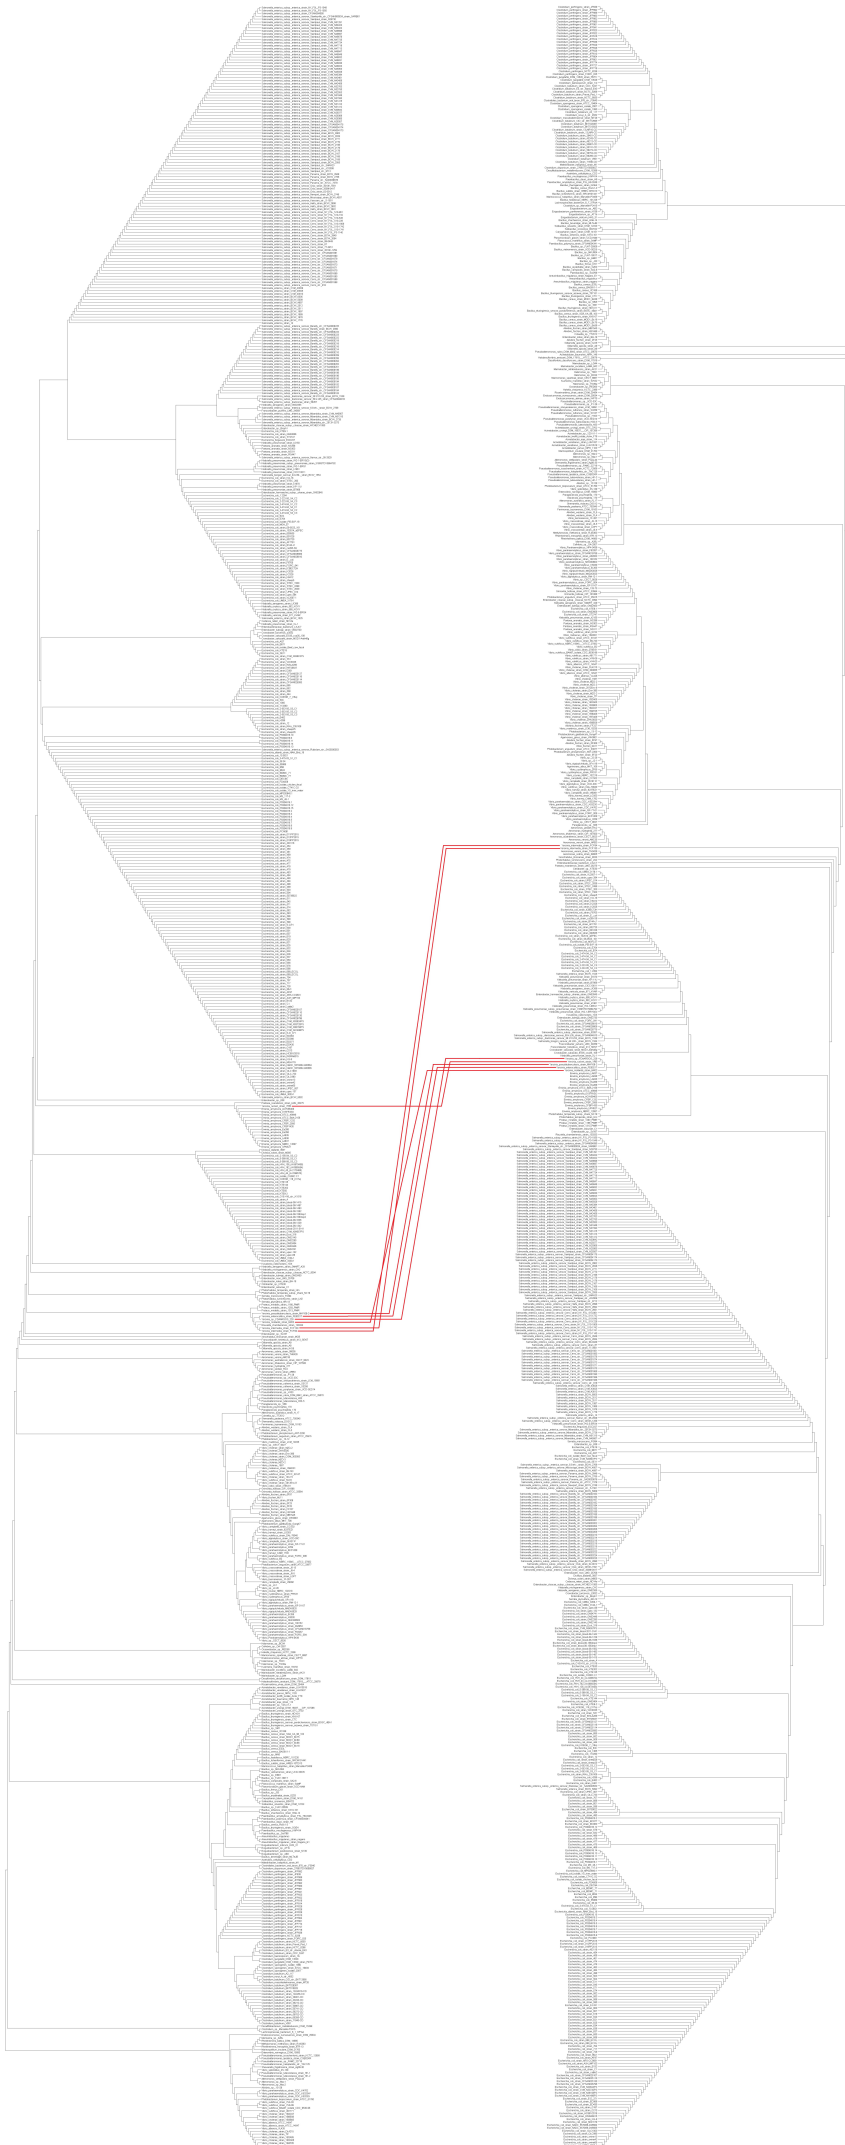

**Figure S1. Comparison of the phylogenies of the M and R components of PT systems.** Tanglegram for DndBCD proteins (left) and DndFGH (right) proteins based on 734 strains with complete PT R-M systems. The tanglegram was prepared using Dendroscope 4.4.4. The topological difference between the DndBCD and DndFGH trees is significantly small ( $p=0.003$ ) compared with that between tree pairs formed by randomly shuffled strains. Examples of phylogenetically divergent DndBCD and DndFGH from one strain are connected by red lines.

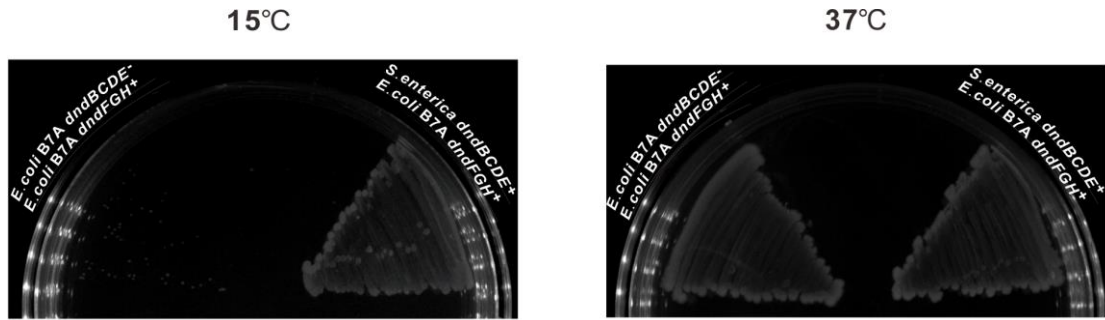

**Figure S2. The PT M genes from *S. enterica* serovar Cerro 87 rescued the DndFGH-induced growth inhibition in a PT-deficient *E. coli* B7A mutant.** Effects of pJTU1238, expressing DndBCDE from *S. enterica* serovar Cerro 87, on the growth of *E. coli* B7A  $\Delta$ dndBCDE at 37 and 15°C on LB-agar plates. DndFGH-mediated growth inhibition is temperature dependent (4). *E. coli* B7A  $\Delta$ dndBCDE harboring empty pBluescript SK+ plasmid was used as the control.

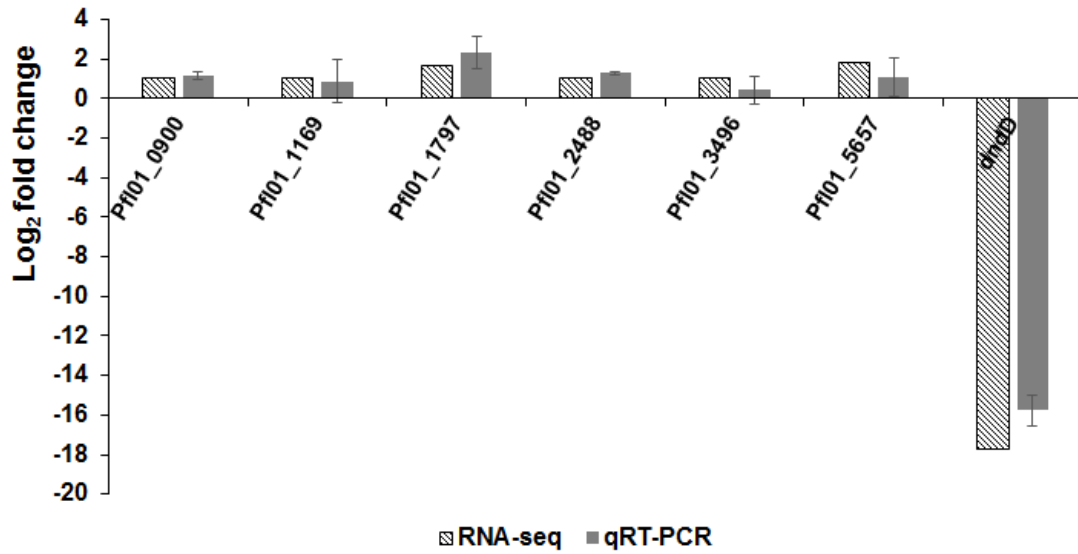

**Figure S3. qRT-PCR validation of differentially transcribed genes.** Analysis of the seven differentially transcribed genes as determined by RNA-Seq (patterned bars) or qRT-PCR (solid bars). The levels are presented relative to the values obtained for the wild-type pf0-1 strain. The values represent the average gene expression values  $\pm$  SDs from three independent qRT-PCR experiments. The housekeeping gene, *rpoD*, which encodes sigma factor  $\sigma^{70}$  was used as the reference for RT-PCR.

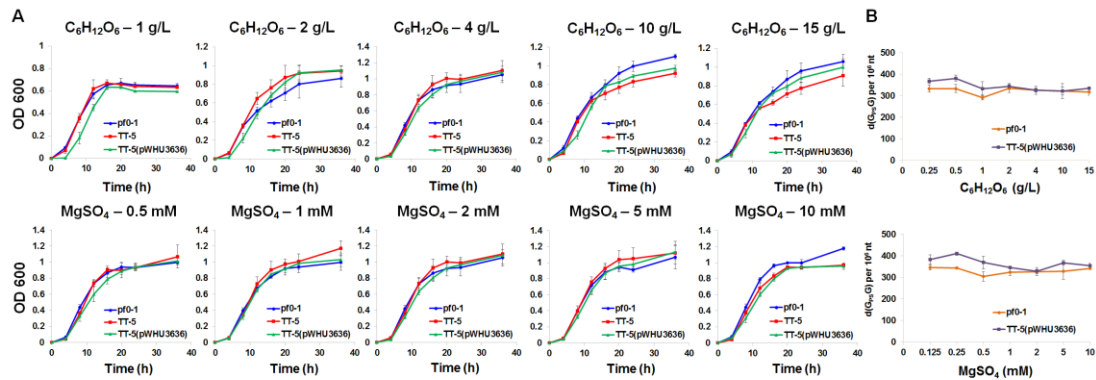

**Figure S4.** (A) Growth of wild-type *P. fluorescens* pf0-1 and the mutant TT-5 and TT-5(pWHU3636) cells cultured in M9 minimal medium supplemented with different concentrations of glucose and sulfate as the carbon and sulfur sources, respectively. TT-5 displayed similar growth profiles to those of the wild-type pf0-1 and TT-5(pWHU3636). pWHU3636 is the derivative of the pDSK519 plasmid, which possesses *dndBCDE* from pf0-1. (B) Different concentrations of carbon and sulfur sources had no apparent impact on the frequency of PT-modified d(G<sub>PS</sub>G) in pf0-1 and TT-5(pWHU3636).

## REFERENCES

1. Dehio C & Meyer M (1997) Maintenance of broad-host-range incompatibility group P and group Q plasmids and transposition of Tn5 in *Bartonella henselae* following conjugal plasmid transfer from *Escherichia coli*. *J Bacteriol* 179(2):538-540.
2. Yao F, Xu T, Zhou X, Deng Z, & You D (2009) Functional analysis of *spfD* gene involved in DNA phosphorothioation in *Pseudomonas fluorescens* Pf0-1. *FEBS Lett* 583(4):729-733.
3. Merriam JJ, Mathur R, Maxfield-Boumil R, & Isberg RR (1997) Analysis of the *Legionella pneumophila* *fliI* gene: intracellular growth of a defined mutant defective for flagellum biosynthesis. *Infect Immun* 65(6):2497-2501.
4. Chen C, *et al.* (2017) Convergence of DNA methylation and phosphorothioation epigenetics in bacterial genomes. *Proc Natl Acad Sci USA* 114(17):4501-4506.
